# Supplementary material for: Development and Validation of the Hypotensive Exposure Duration Index for Mortality Risk Prediction in Critically III Patients
Source: Research Square preprint supplement (doi:10.21203/rs.3.rs-7288238/v1), 2025-08-18
Supplement: Supplementary file 1 [file ef63ebc7358eb9b91dafd308.docx]

# Supplymentary Material

**Table S1. Missing Data Handling and Imputation Strategies for Training and Validation Datasets**

|  | **Training Datasets (SICdb database)** | | |  | **Training Datasets (eICU database)** | | |
| --- | --- | --- | --- | --- | --- | --- | --- |
| **Variable** | **Imputation Method** | **Imputation Value** | **Missing Percentage  (%)** |  | **Imputation Method** | **Imputation Value** | **Missing Percentage (%)** |
| **Hb** | Median | 8.9 | 0.9 |  | Median | 9.3 | 0.96 |
| **WBC** | Median | 12.81 | 0.9 |  | Median | 14.6 | 1.26 |
| **MCV** | Median | 87.6 | 0.9 |  | Median | 89 | 12.37 |
| **MCHC** | Median | 33.5 | 0.9 |  | Median | 32.8 | 4.8 |
| **MCH** | Median | 30 | 0.9 |  | Median | 29.7 | 4.8 |
| **Lactate** | Median | 2.56 | 0.02 |  | Median | 2.4 | 61.27 |
| **Creatinine** | Median | 1 | 1.39 |  | Median | 1.13 | 0.98 |
| **PLT** | Median | 147 | 0.93 |  | Median | 142 | 1.2 |
| **SOFA** | Median | 5 | 0.04 |  | / | / | 0 |
| **HCT** | Median | 36 | 0.13 |  | Median | 36.5 | 0.86 |
| **BE** | Median | -3.8 | 0.11 |  | Median | -3.8 | 38.85 |
| **Mg** | Median | 0.8 | 2.88 |  | Median | 1.8 | 22.34 |
| **Sodium** | Median | 138 | 16.82 |  | Median | 137 | 1.75 |
| **pH** | Median | 7.325 | 0.1 |  | Median | 7.31 | 26.95 |
| **SpO**2 | Median | 92.4 | 0.01 |  | Median | 90 | 8.79 |
| **RR** | Median | 17 | 20.34 |  | Median | 10 | 2.15 |
| **T** | Median | 37.8 | 2.09 |  | Median | 37.6 | 1.37 |
| **Height** | / | / | 0 |  | Median | 82.6 | 0.49 |
| **Weight** | / | / | 0 |  | Median | 170.2 | 2.44 |

BE: Base Excess; eICU: eICU Collaborative Research Database; Hb: Hemoglobin; HCT: Hematocrit; MCH: Mean Corpuscular Hemoglobin; MCHC: Mean Corpuscular Hemoglobin Concentration; MCV: Mean Corpuscular Volume; Mg: Magnesium; PLT: Platelet Count; RR: Respiratory Rate; SICdb: Salzburg Intensive Care database; SOFA: Sequential Organ Failure Assessment; SpO2: Oxygen Saturation; T: Temperature; WBC: White Blood Cell Count.

**Table S2. Performance of different time point HEDI in predicting ICU mortality**

| **HEDI** | **Cut-off** | **AUC (95% CI)** | **Sensitivity (95% CI)** | **Specificity  (95% CI)** | **PLR (95% CI)** | **NLR (95% CI)** | **PPV (95% CI)** | **NPV (95% CI)** |
| --- | --- | --- | --- | --- | --- | --- | --- | --- |
| 24h | 0.49 | 0.587 (0.567 - 0.608) | 41.82 (32.5 - 57.4) | 74.68 (59.7 - 83.3) | 1.65 (1.40 - 2.08) | 0.78 (0.70 - 0.82) | 11.7 (9.9 - 14.5) | 94.1 (93.7 - 94.8) |
| 30h | 0.73 | 0.608 (0.587 - 0.627) | 39.16 (37.1 - 54.9) | 81.28 (64.7 - 81.8) | 2.09 (1.58 - 2.24) | 0.75 (0.67 - 0.77) | 14.4 (11.0 - 15.4) | 94.3 (94.0 - 95.0) |
| 36h | 0.56 | 0.629 (0.610 - 0.650) | 49.80 (40.5 - 62.2) | 72.73 (60.6 - 82.0) | 1.83 (1.57 - 2.32) | 0.69 (0.62 - 0.74) | 12.8 (11.1 - 15.9) | 94.8 (94.3 - 95.3) |
| 42h | 0.59 | 0.645 (0.623 - 0.665) | 52.97 (43.0 - 64.3) | 72.77 (59.5 - 82.9) | 1.95 (1.64 - 2.48) | 0.65 (0.58 - 0.70) | 13.5 (11.6 - 16.6) | 95.1 (94.6 - 95.6) |
| 48h | 0.64 | 0.656 (0.634 - 0.675) | 54.19 (49.0 - 62.7) | 73.67 (65.1 - 77.8) | 2.06 (1.76 - 2.35) | 0.62 (0.56 - 0.66) | 14.2 (12.5 - 16.0) | 95.3 (94.8 - 95.7) |
| 54h | 0.64 | 0.665 (0.644 - 0.685) | 55.73 (48.5 - 64.2) | 73.15 (65.6 - 79.5) | 2.08 (1.81 - 2.45) | 0.61 (0.54 - 0.65) | 14.3 (12.4 - 16.5) | 95.4 (94.9 - 96.0) |
| 60h | 0.64 | 0.672 (0.653 - 0.692) | 57.16 (48.1 - 64.2) | 72.79 (66.4 - 81.2) | 2.10 (1.87 - 2.62) | 0.59 (0.53 - 0.64) | 14.4 (12.9 - 17.5) | 95.5 (95.0 - 96.0) |
| 66h | 0.64 | 0.676 (0.657 - 0.696) | 58.18 (48.9 - 63.6) | 72.52 (69.0 - 81.1) | 2.12 (1.93 - 2.66) | 0.58 (0.52 - 0.64) | 14.5 (13.3 - 17.7) | 95.6 (95.1 - 96.1) |
| 72h | 0.64 | 0.681 (0.661 - 0.701) | 59.00 (51.3 - 63.5) | 72.42 (69.3 - 80.4) | 2.14 (2.01 - 2.63) | 0.57 (0.52 - 0.62) | 14.6 (13.5 - 17.8) | 95.7 (95.1 - 96.1) |

PPV: Positive predictive value; PLR: Positive likelihood ratio; NPV: Negative predictive value; NLR: Negative likelihood ratio.

**Table S3. Performance metrics comparison of nine machine learning algorithms on training and internal testing datasets.**

|  |  | **Accuracy** | **Sensitivity** | **Specificity** | **PPV** | **NPV** | **F1 score** | **Kappa score** | **ROC AUC** |
| --- | --- | --- | --- | --- | --- | --- | --- | --- | --- |
| **Tain Dataset** | **ANN** | 0.808 (0.809, 0.809) | 0.674 (0.673, 0.673) | 0.960 (0.960, 0.960) | 0.950 (0.949, 0.949) | 0.674 (0.673, 0.673) | 0.788 (0.788, 0.788) | 0.621 (0.623, 0.623) | 0.817 (0.817, 0.817) |
| **Decision Tree** | 0.951 (0.953, 0.953) | 0.958 (0.958, 0.958) | 0.943 (0.947, 0.947) | 0.950 (0.953, 0.953) | 0.958 (0.958, 0.958) | 0.954 (0.955, 0.955) | 0.902 (0.905, 0.905) | 0.951 (0.953, 0.953) |
| **Extra Trees** | 1.000 (1.000, 1.000) | 1.000 (1.000, 1.000) | 1.000 (1.000, 1.000) | 1.000 (1.000, 1.000) | 1.000 (1.000, 1.000) | 1.000 (1.000, 1.000) | 1.000 (1.000, 1.000) | 1.000 (1.000, 1.000) |
| **Gradient Boosting** | 1.000 (1.000, 1.000) | 1.000 (1.000, 1.000) | 1.000 (1.000, 1.000) | 1.000 (1.000, 1.000) | 1.000 (1.000, 1.000) | 1.000 (1.000, 1.000) | 1.000 (1.000, 1.000) | 1.000 (1.000, 1.000) |
| **KNN** | 1.000 (1.000, 1.000) | 1.000 (1.000, 1.000) | 1.000 (1.000, 1.000) | 1.000 (1.000, 1.000) | 1.000 (1.000, 1.000) | 1.000 (1.000, 1.000) | 1.000 (1.000, 1.000) | 1.000 (1.000, 1.000) |
| **LightGBM** | 1.000 (1.000, 1.000) | 1.000 (1.000, 1.000) | 1.000 (1.000, 1.000) | 1.000 (1.000, 1.000) | 1.000 (1.000, 1.000) | 1.000 (1.000, 1.000) | 1.000 (1.000, 1.000) | 1.000 (1.000, 1.000) |
| **Random Forest** | 1.000 (1.000, 1.000) | 1.000 (1.000, 1.000) | 1.000 (1.000, 1.000) | 1.000 (1.000, 1.000) | 1.000 (1.000, 1.000) | 1.000 (1.000, 1.000) | 1.000 (1.000, 1.000) | 1.000 (1.000, 1.000) |
| **SVM** | 0.767 (0.777, 0.777) | 0.671 (0.677, 0.677) | 0.875 (0.887, 0.887) | 0.860 (0.870, 0.870) | 0.671 (0.677, 0.677) | 0.754 (0.762, 0.762) | 0.539 (0.558, 0.558) | 0.773 (0.782, 0.782) |
| **XGBoost** | 1.000 (1.000, 1.000) | 1.000 (1.000, 1.000) | 1.000 (1.000, 1.000) | 1.000 (1.000, 1.000) | 1.000 (1.000, 1.000) | 1.000 (1.000, 1.000) | 1.000 (1.000, 1.000) | 1.000 (1.000, 1.000) |
|  |  |  |  |  |  |  |  |  |  |
| **Test Dataset** | **ANN** | 0.804 (0.791, 0.816) | 0.667 (0.646, 0.687) | 0.959 (0.949, 0.967) | 0.948 (0.937, 0.959) | 0.667 (0.648, 0.687) | 0.783 (0.769, 0.798) | 0.613 (0.590, 0.636) | 0.813 (0.801, 0.823) |
| **Decision Tree** | 0.904 (0.895, 0.913) | 0.925 (0.913, 0.935) | 0.880 (0.865, 0.894) | 0.898 (0.885, 0.910) | 0.925 (0.914, 0.936) | 0.911 (0.902, 0.919) | 0.806 (0.788, 0.825) | 0.902 (0.893, 0.912) |
| **Extra Trees** | 0.972 (0.968, 0.977) | 0.986 (0.981, 0.990) | 0.957 (0.947, 0.966) | 0.963 (0.954, 0.971) | 0.986 (0.981, 0.991) | 0.974 (0.970, 0.979) | 0.944 (0.934, 0.954) | 0.971 (0.966, 0.977) |
| **Gradient Boosting** | 0.973 (0.968, 0.978) | 0.977 (0.971, 0.983) | 0.968 (0.960, 0.976) | 0.972 (0.965, 0.979) | 0.977 (0.971, 0.984) | 0.975 (0.970, 0.980) | 0.946 (0.936, 0.955) | 0.973 (0.968, 0.978) |
| **KNN** | 0.969 (0.963, 0.974) | 0.994 (0.991, 0.997) | 0.940 (0.928, 0.951) | 0.950 (0.940, 0.959) | 0.994 (0.991, 0.997) | 0.972 (0.967, 0.976) | 0.938 (0.926, 0.948) | 0.967 (0.962, 0.973) |
| **LightGBM** | 0.977 (0.972, 0.982) | 0.985 (0.979, 0.990) | 0.969 (0.961, 0.976) | 0.973 (0.965, 0.980) | 0.985 (0.980, 0.990) | 0.979 (0.974, 0.983) | 0.954 (0.945, 0.964) | 0.977 (0.972, 0.981) |
| **Random Forest** | 0.965 (0.959, 0.970) | 0.980 (0.974, 0.986) | 0.948 (0.937, 0.958) | 0.955 (0.946, 0.964) | 0.980 (0.974, 0.986) | 0.968 (0.962, 0.973) | 0.930 (0.917, 0.941) | 0.964 (0.958, 0.970) |
| **SVM** | 0.775 (0.762, 0.788) | 0.684 (0.666, 0.703) | 0.878 (0.863, 0.893) | 0.864 (0.847, 0.880) | 0.684 (0.665, 0.704) | 0.764 (0.749, 0.779) | 0.554 (0.526, 0.579) | 0.781 (0.768, 0.794) |
| **XGBoost** | 0.973 (0.968, 0.978) | 0.979 (0.973, 0.985) | 0.966 (0.958, 0.974) | 0.970 (0.963, 0.978) | 0.979 (0.973, 0.985) | 0.975 (0.970, 0.979) | 0.946 (0.935, 0.956) | 0.973 (0.967, 0.978) |

ANN: Artificial Neural Network; KNN: K-Nearest Neighbors; LightGBM: Light Gradient Boosting Machine; NPV: Negative predictive value; PPV: Positive predictive value; ROC AUC: Receiver Operating Characteristic Area Under the Curve; SVM: Support Vector Machine; XGBoost: Extreme Gradient Boosting

**Table S4. Performance metrics comparison of nine machine learning algorithms on training and internal testing datasets.**

|  | **Survivors  (n = 12202)** | **Non-survivors  (n = 978)** | **P-value** |
| --- | --- | --- | --- |
| **Age, (years)** | 66 [56, 75] | 67.5 [56, 77] | 0.022 |
| **Gender, (male)** | 12202 (100.0%) | 978 (100.0%) | 1 |
| **Height, (cm)** | 170.2 [162.6, 177.8] | 170.2 [162.6, 177.8] | 0.394 |
| **Weight, (kg)** | 82.6 [69.9, 97.8] | 81.6 [67.9, 100.0] | 0.134 |
| **BMI, (kg/m2)** | 28.2 [24.4, 33.1] | 27.8 [23.7, 33.4] | 0.138 |
| **Renal Dysfunction, n (%)** | 1238 (10.1%) | 147 (15.0%) | < 0.001 |
| **Diabetes, n (%)** | 3496 (28.7%) | 295 (30.2%) | 0.333 |
| **Hypertension, n (%)** | 6624 (54.3%) | 515 (52.7%) | 0.342 |
| **Lung Disease, n (%)** | 1528 (12.5%) | 174 (17.8%) | < 0.001 |
| **Fluid Input, (ml)** | 5266.0 [0.00, 17315.1] | 5318.0 [0.00, 22735.0] | < 0.001 |
| **Urine Output, (ml)** | 6502.0 [3392.0, 12194.0] | 4285.0 [1397.5, 10601.5] | < 0.001 |
| **Fluid Balance, (ml)** | -930.73 [-4475.00, 5544.21] | 0.00 [-2858.00, 11746.25] | < 0.001 |
| **Blood Product Input, (ml)** | 630.5 [630.5, 630.5] | 630.5 [630.5, 630.5] | < 0.001 |
| **Minimum_BE** | -3.0 [-4.0, -1.9] | -6.0 [-14.0, -3.0] | < 0.001 |
| **Minimum_pH** | 7.31 [7.29, 7.34] | 7.21 [7.10, 7.31] | < 0.001 |
| **Minimum_Mg (mmol/L)** | 1.80 [1.70, 2.00] | 1.80 [1.50, 1.90] | < 0.001 |
| **Minimum_MCH, (g/L)** | 29.70 [28.60, 30.70] | 29.70 [28.23, 30.80] | 0.054 |
| **Minimum_MCHC** | 32.80 [32.00, 33.50] | 32.30 [31.30, 33.10] | < 0.001 |
| **Minimum_MCV** | 89.00 [86.00, 92.60] | 89.00 [85.00, 93.00] | 0.989 |
| **Minimum_Sodium, (mmol/L)** | 137 [134, 139] | 137 [134, 141] | < 0.001 |
| **Maximum_Lactate, (mmol/L)** | 2.40 [2.40, 2.40] | 4.30 [2.40, 10.17] | < 0.001 |
| **Maximum_Cr, (mg/dL)** | 1.10 [0.85, 1.55] | 2.13 [1.36, 3.34] | < 0.001 |
| **Maximum_WBC, (x109/L)** | 14.5 [11.0, 18.7] | 18.3 [13.4, 24.8] | < 0.001 |
| **Maximum_HCT, (%)** | 36.4 [32.2, 40.8] | 36.4 [32.0, 42.0] | 0.203 |
| **Minimum_Hb, (g/L)** | 9.3 [7.9, 10.8] | 9.0 [7.5, 10.7] | < 0.001 |
| **Minimum_PLT, (x109/L)** | 142 [104, 193] | 119 [61, 175] | < 0.001 |
| **Minimum_SpO2, (%)** | 90 [88, 93] | 85 [69, 90] | < 0.001 |
| **Minimum_RR, (bpm)** | 10.00 [8.00, 12.00] | 10.00 [7.00, 14.00] | 0.762 |
| **Maximum_T, (℃**) | 37.6 [37.2, 38.1] | 37.7 [37.2, 38.5] | < 0.001 |
| **Maximum_SOFA** | 7 [5, 10] | 13 [10, 15] | < 0.001 |
| **Vasopressor Used, n (%)** | 3427 (28.1%) | 594 (60.7%) | < 0.001 |
| **Positive Balance, n (%)** | 5223 (42.8%) | 476 (48.7%) | < 0.001 |
| **Negative Balance, n (%)** | 6780 (55.6%) | 460 (47.0%) | < 0.001 |
| **Blood Product Transfusion, n (%)** | 1711 (14.0%) | 180 (18.4%) | < 0.001 |
| **Hyperkalemia, n (%)** | 580 (4.8%) | 198 (20.2%) | < 0.001 |
| **Hyperthermia, n (%)** | 1251 (10.3%) | 243 (24.8%) | < 0.001 |
| **Fever, n (%)** | 8862 (72.6%) | 684 (69.9%) | 0.076 |
| **Mean_MAP, (mmHg)** | 79 [73, 87] | 75 [68, 83] | < 0.001 |
| **Minimum_MAP, (mmHg)** | 60 [54, 68] | 49 [49, 58] | < 0.001 |
| **Maximum_MAP, (mmHg)** | 105 [94, 121] | 107 [93, 126] | 0.032 |
| **TWMAP, (mmHg)** | 79 [73, 87] | 75 [68, 83] | < 0.001 |
| **HEDI** | 0.18 [-0.07, 0.71] | 0.90 [0.17, 2.19] | < 0.001 |

BE: Base Excess; BMI: body mass index; bpm: breath per minute; Cr: Creatinine; Hb: Hemoglobin; HCT: Hematocrit; HEDI: Hypotension Exposure Duration Index; MAP: Mean Artery Pressure; MCH: Mean Corpuscular Hemoglobin; MCHC: Mean Corpuscular Hemoglobin Concentration; MCV: Mean Corpuscular Volume; Mg: Magnesium; PLT: Platelet Count; RDW: RR: Respiratory Rate; SOFA: Sequential Organ Failure Assessment; SpO2: Oxygen Saturation; T: Temperature; TWMAP: Time Weighted Mean Artery Pressure; WBC: White Blood Cell Count.

**Table S5. Performance metrics of the Extra Trees model in the external validation cohort and stratified by vasoactive medication use.**

|  | **Total validation cohort (n = 13,180)** | **Receiving Vasoactive (n = 3,976)** | **Non Receiving Vasoactive (n = 9,204)** |
| --- | --- | --- | --- |
| **Accuracy** | **0.871 (0.865, 0.876)** | **0.802 (0.788, 0.814)** | **0.901 (0.895, 0.907)** |
| **Sensitivity** | **0.544 (0.518, 0.567)** | **0.645 (0.611, 0.679)** | **0.425 (0.384, 0.463)** |
| **Specificity** | **0.911 (0.906, 0.916)** | **0.839 (0.827, 0.851)** | **0.938 (0.933, 0.944)** |
| **PPV** | **0.429 (0.407, 0.451)** | **0.491 (0.461, 0.521)** | **0.351 (0.319, 0.384)** |
| **NPV** | **0.544 (0.517, 0.569)** | **0.645 (0.611, 0.678)** | **0.425 (0.390, 0.463)** |
| **F1 score** | **0.480 (0.457, 0.499)** | **0.558 (0.530, 0.584)** | **0.384 (0.353, 0.416)** |
| **Kappa score** | **0.407 (0.383, 0.430)** | **0.433 (0.400, 0.467)** | **0.331 (0.297, 0.363)** |
| **ROC AUC** | **0.727 (0.715, 0.740)** | **0.742 (0.725, 0.759)** | **0.682 (0.663, 0.700)** |

NPV: Negative predictive value; PPV: Positive predictive value; ROC AUC: area under the receiver operating characteristic curve.

**Figure S1. Patient Selection Flowchart for the Training Cohort.**


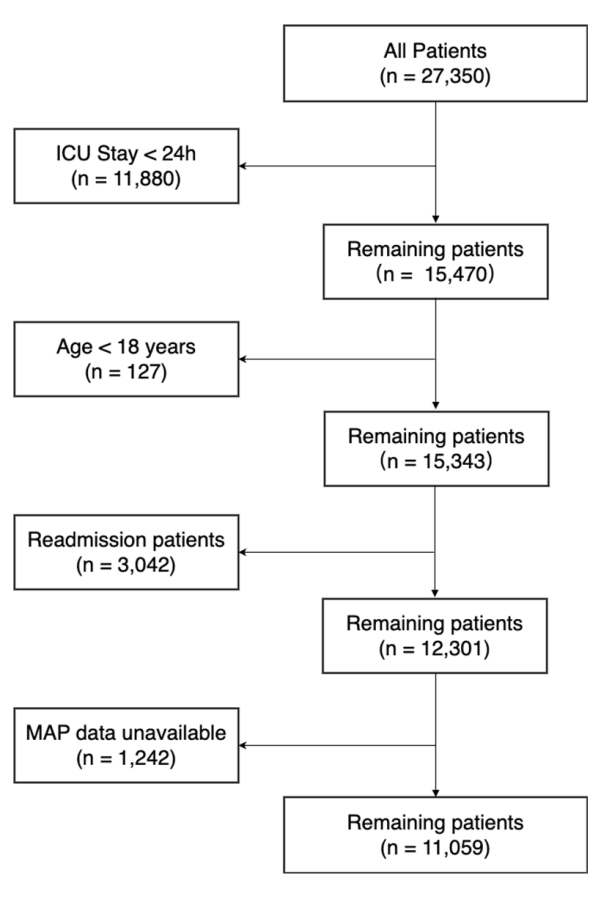


ICU: intensive care unit; MAP: mean artery pressure.

**Figure S2.Feature Selection Analysis for ICU Mortality Prediction Model.**

**
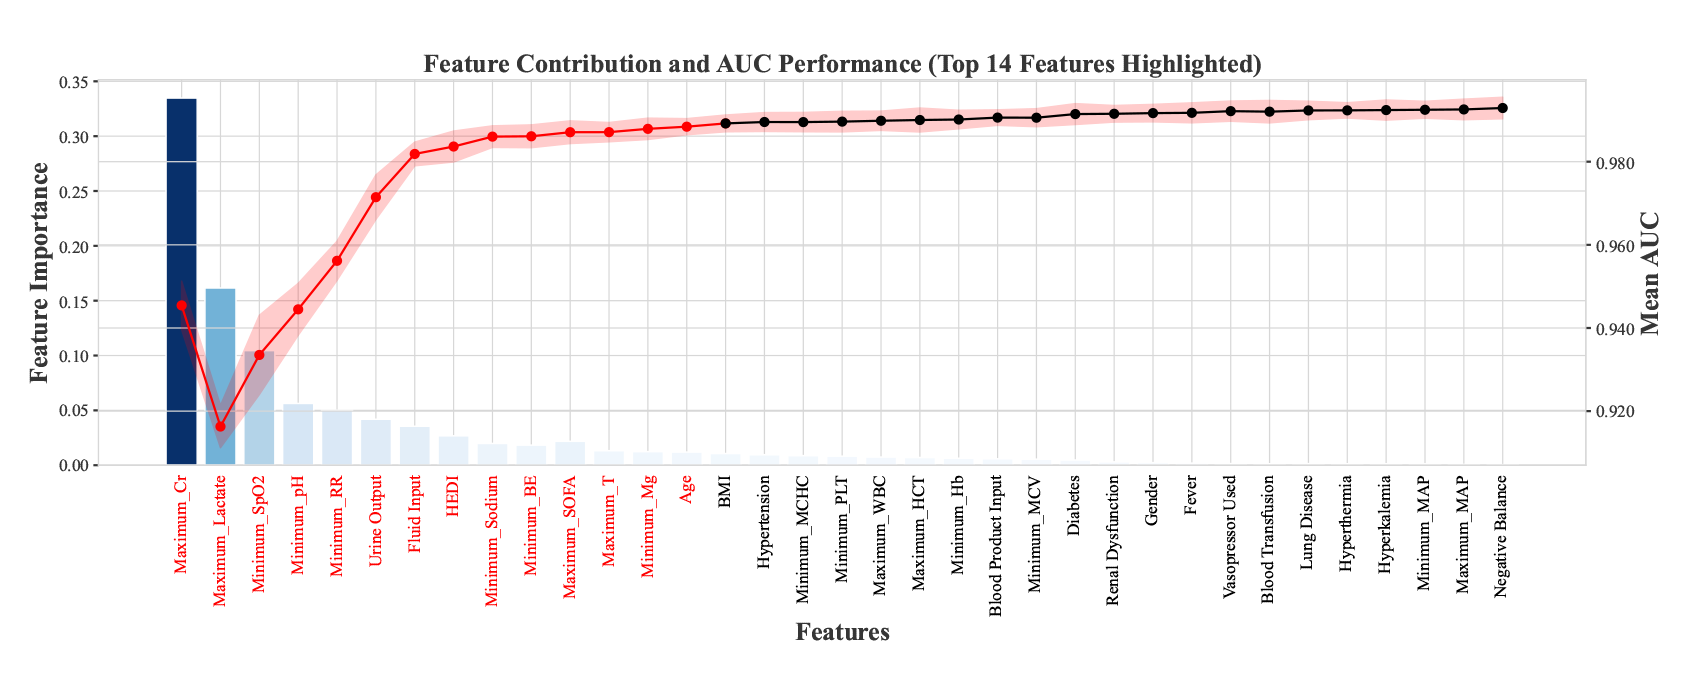
**

The primary y-axis (bars) represents individual feature contribution to the model, while the secondary y-axis (red curve) shows cumulative AUC performance as features are progressively added. The optimal 14 contributing features are highlighted, with maximum Cr demonstrating the highest predictive value, followed by minimum SpO2, urine output, and maximum Lactate. The 48h HEDI metric ranks as an important predictor (8th position), confirming its independent contribution to mortality prediction.This feature selection approach optimizes model performance while maintaining clinical interpretability.

**Figure S3. Patient Selection Flowchart for the Training Cohort.**

**
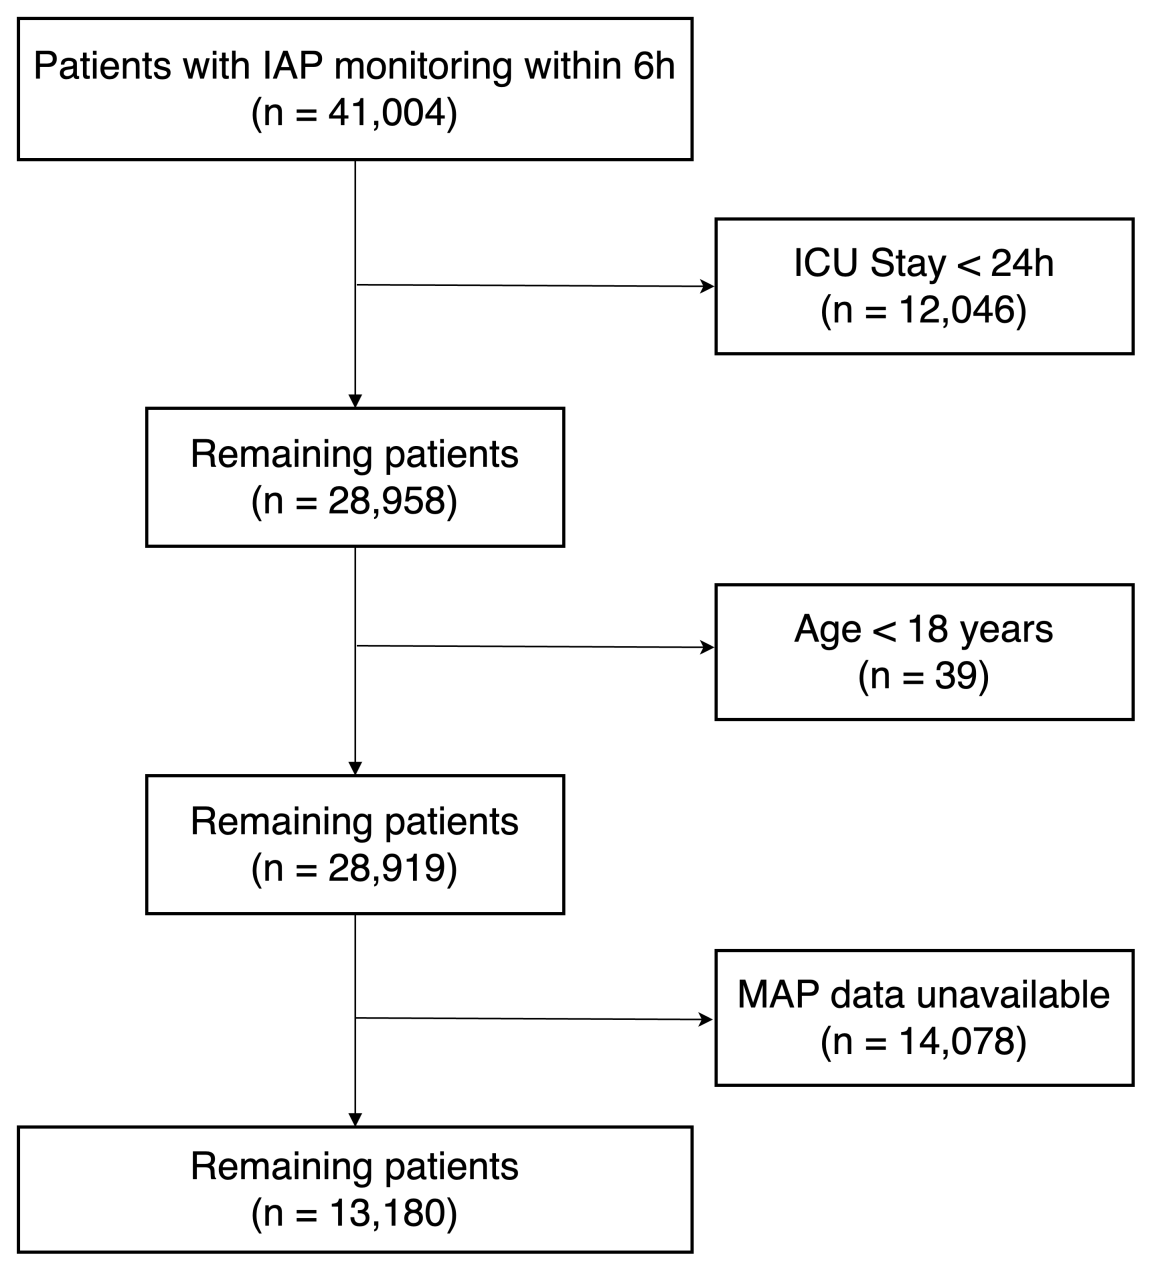
**

IAP: Invasive Artery Pressure; ICU: intensive care unit; MAP: mean artery pressure.

**Figure S4. Feature Selection Analysis for ICU Mortality Prediction Model based on 48-hour HEDI.**

**
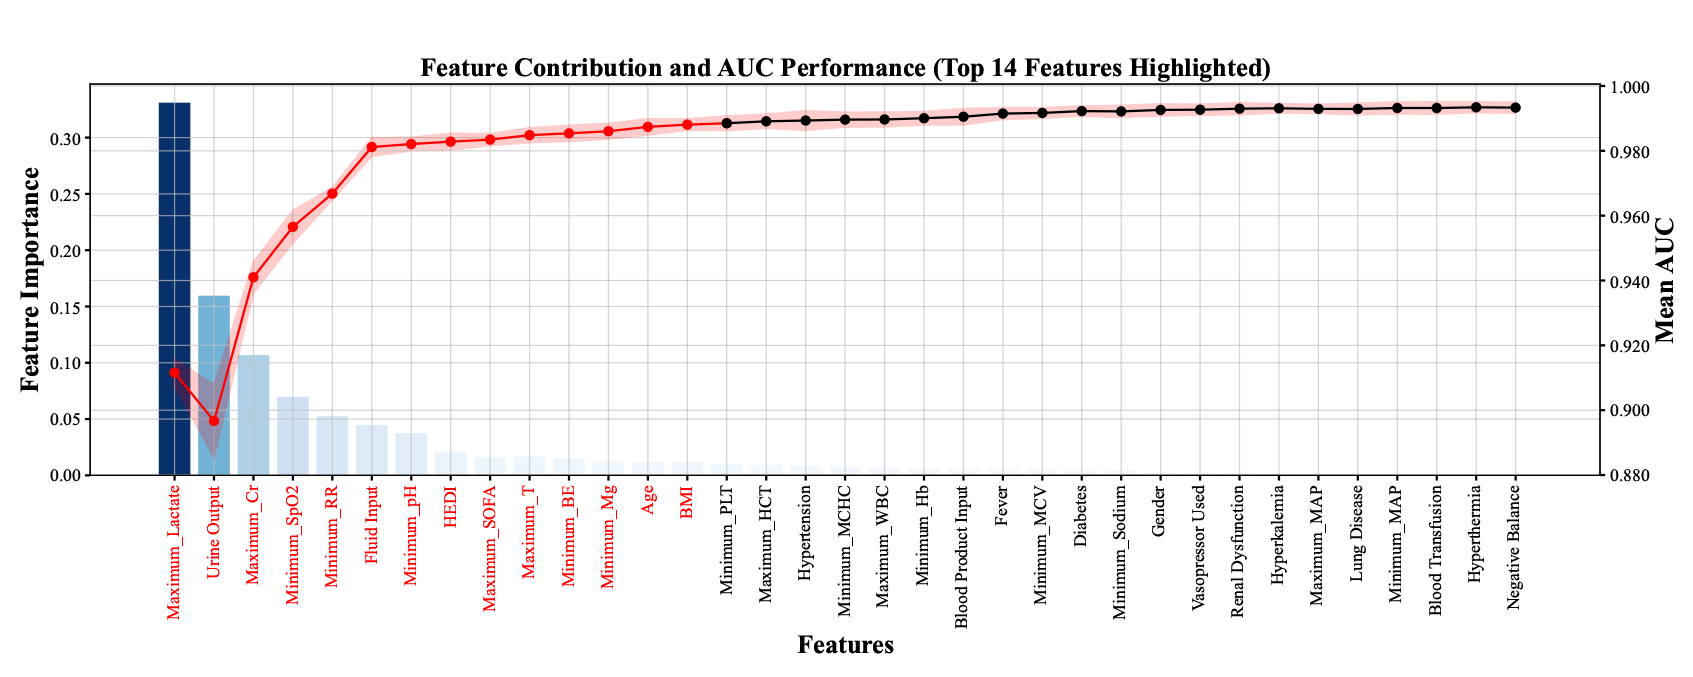
**

The primary y-axis (bars) represents individual feature contribution to the model, while the secondary y-axis (red curve) shows cumulative AUC performance as features are progressively added. The optimal 14 contributing features are highlighted, with maximum Lactate demonstrating the highest predictive value, followed by urine output, and maximum Cr. The 48h HEDI metric ranks as an important predictor (8th position), confirming its independent contribution to mortality prediction.

**Figure S5.Performance Comparison of Machine Learning Models for ICU Mortality Prediction Based on 48-hour HEDI.**


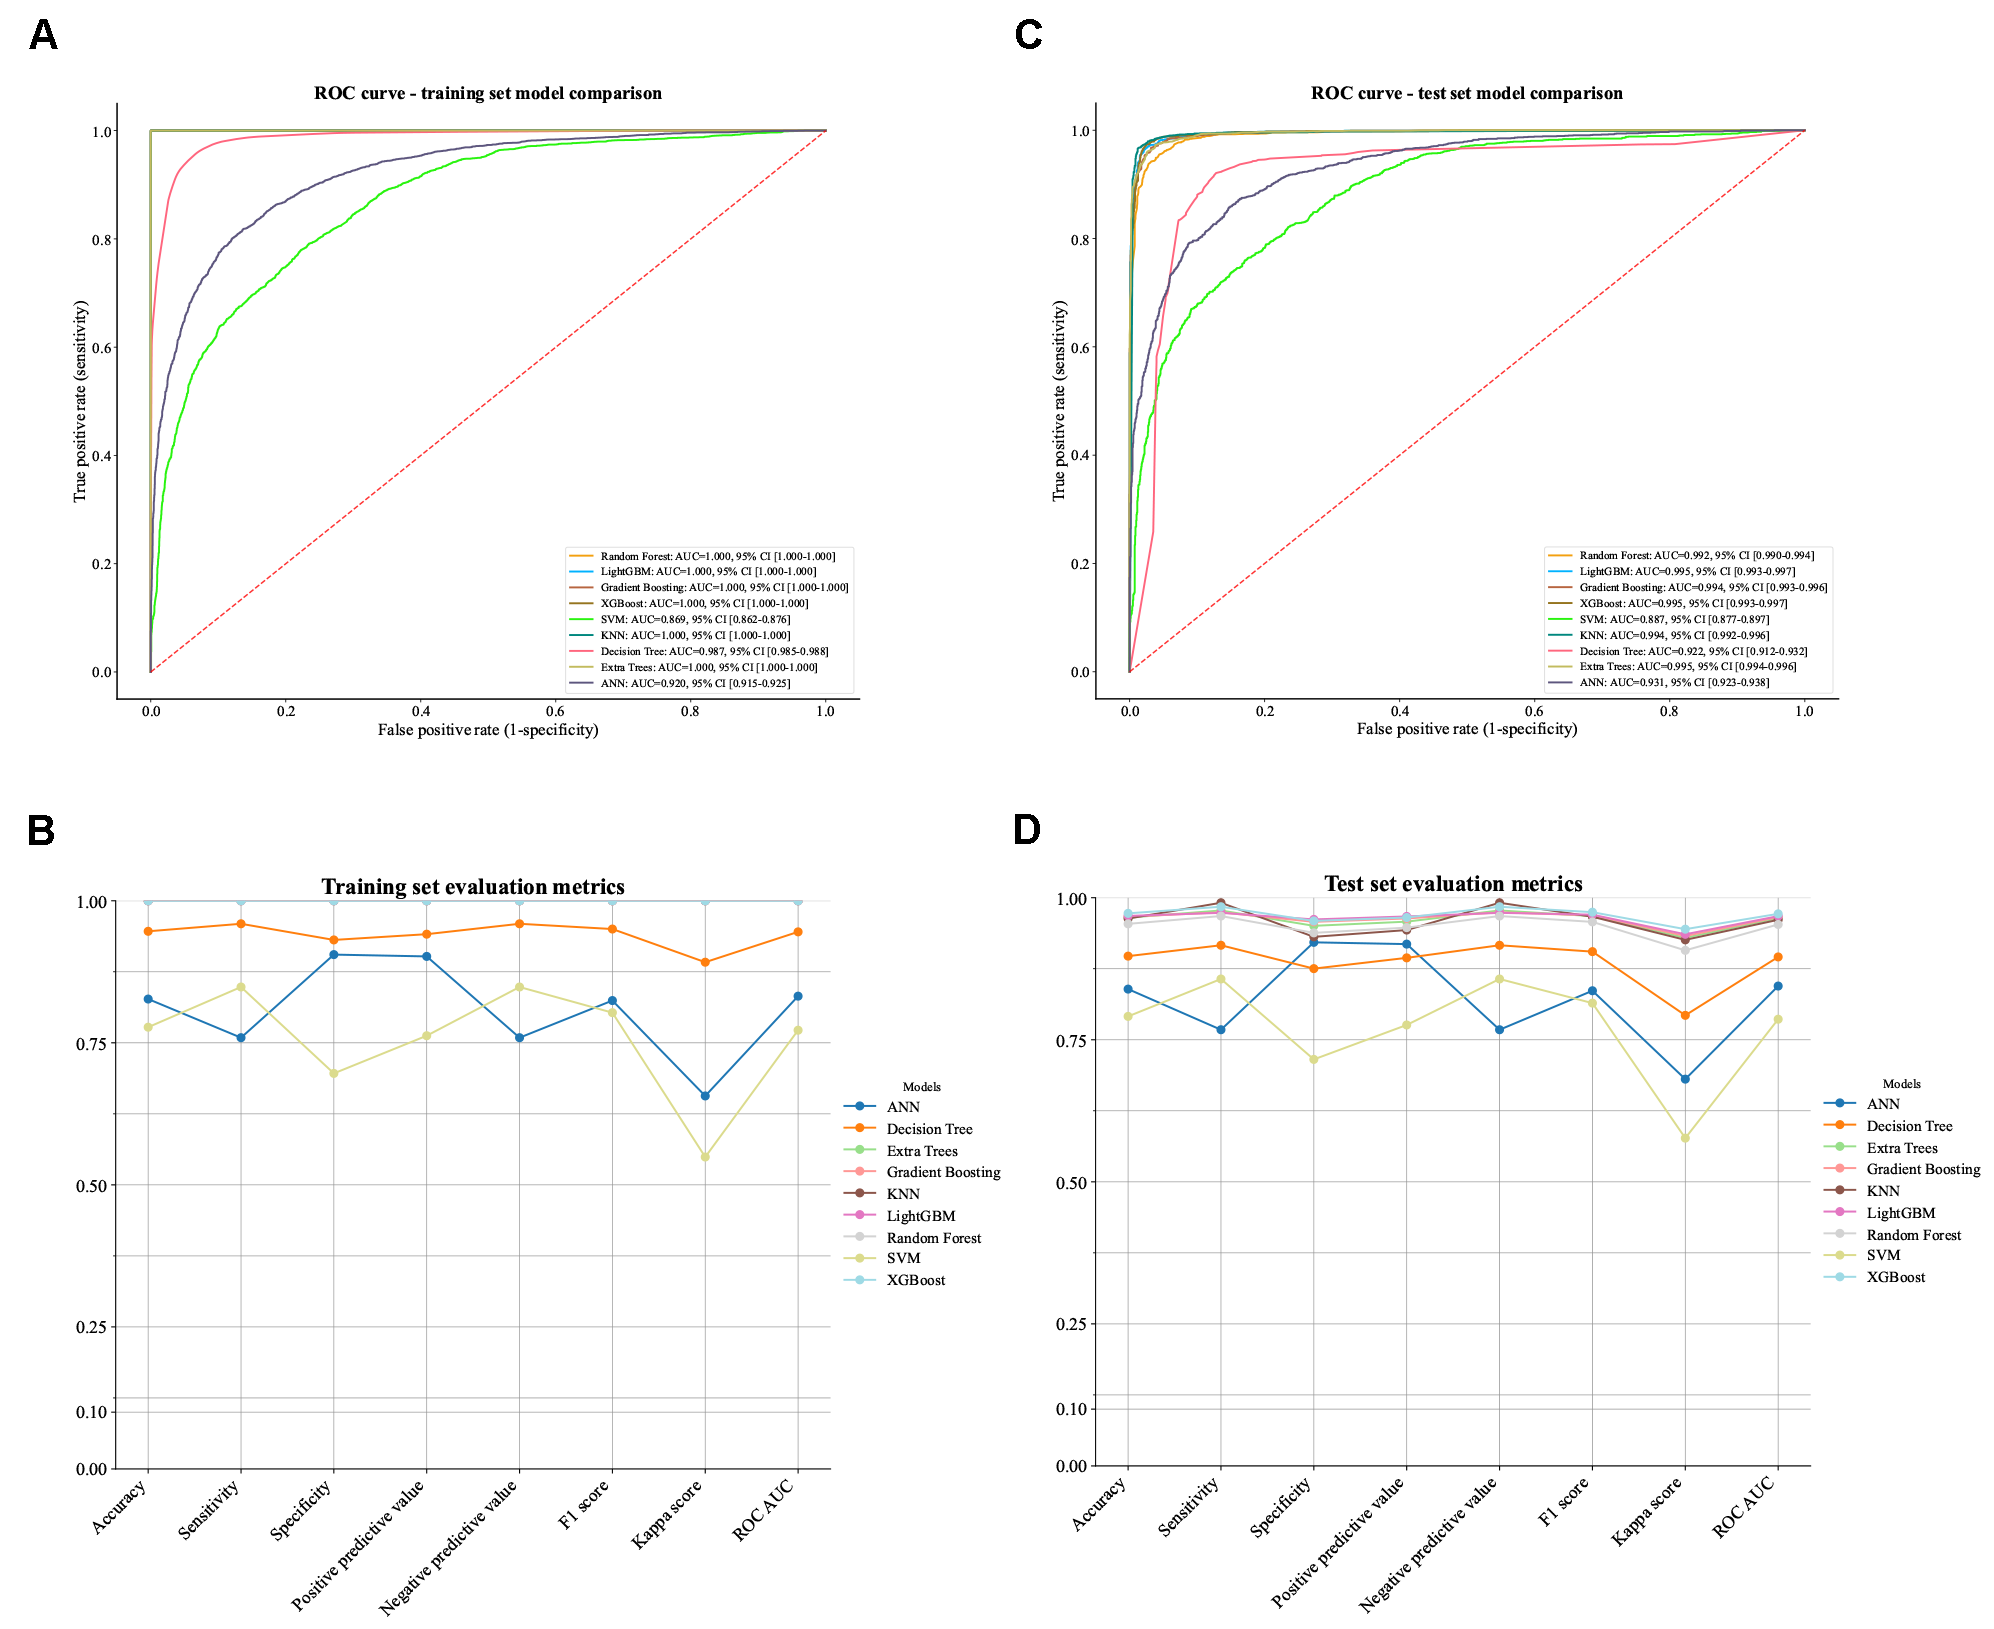


Panel A: ROC curves for nine different machine learning models on the training set, all demonstrating excellent discriminative ability with AUC values exceeding 0.86. Panel B: Comprehensive evaluation metrics for all models on the training set, including accuracy, sensitivity, specificity, positive and negative predictive values, F1 score, Kappa score, and ROC AUC. Panel C: ROC curves for the same models applied to the internal test set, maintaining robust performance. Panel D: Evaluation metrics for the internal test set, showing consistent performance across all assessment criteria.

**Figure S6. Feature Importance Analysis of Machine Learning Models with 48-hour HEDI for ICU Mortality Prediction.**

**
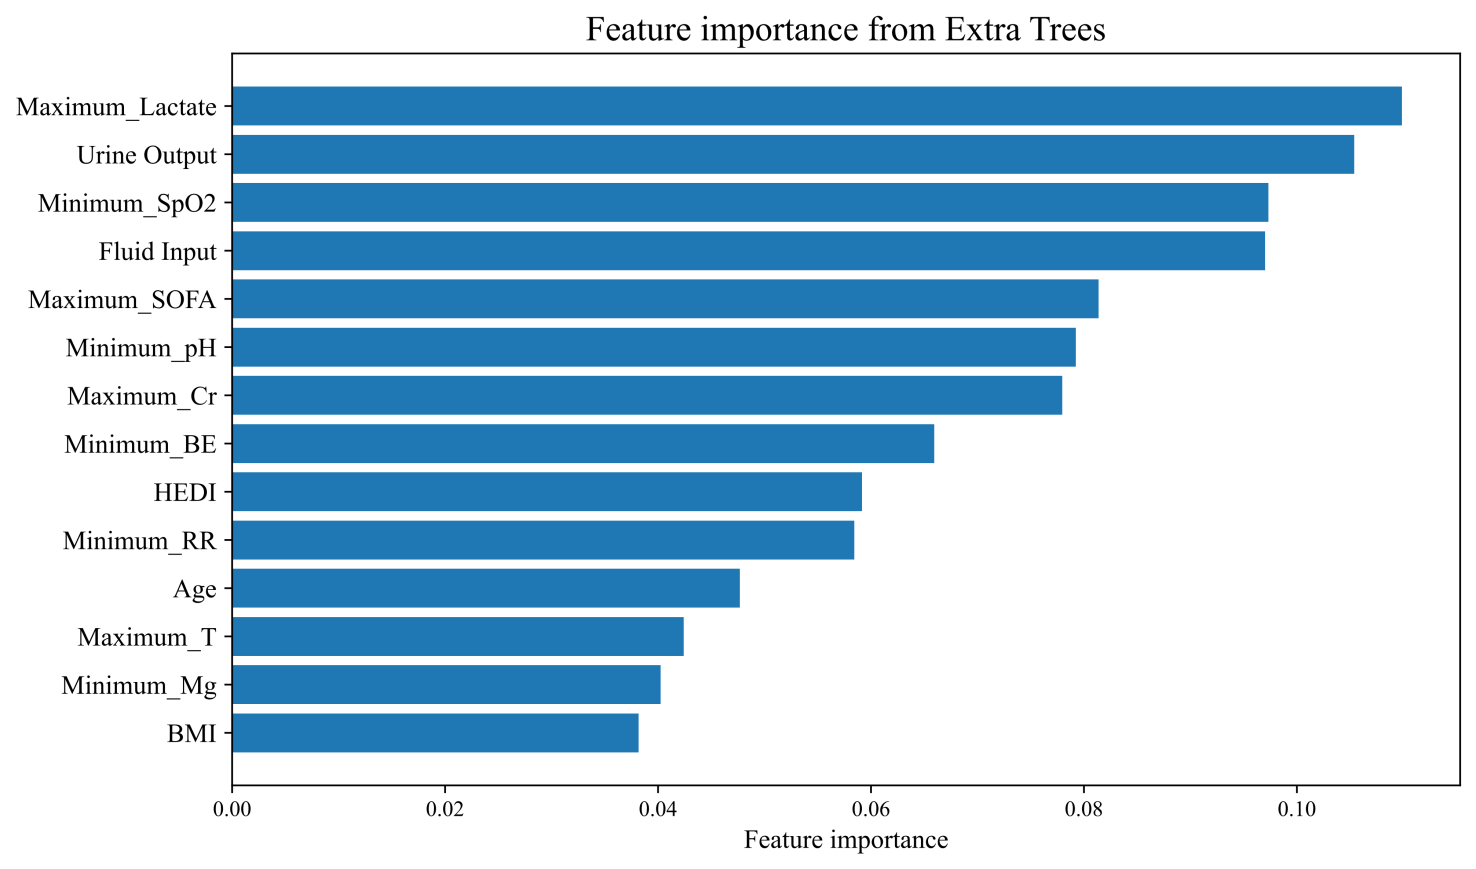
**

Relative feature importance rankings from the best-performing models: Extra Trees. Traditional clinical parameters such maximum lactate level and urine output demonstrate the highest predictive value. HEDI consistently appears as an important predictor across all models, ranking 9th in Extra Trees.

**Figure S7. SHAP Analysis of Feature Contributions to ICU Mortality Prediction.**


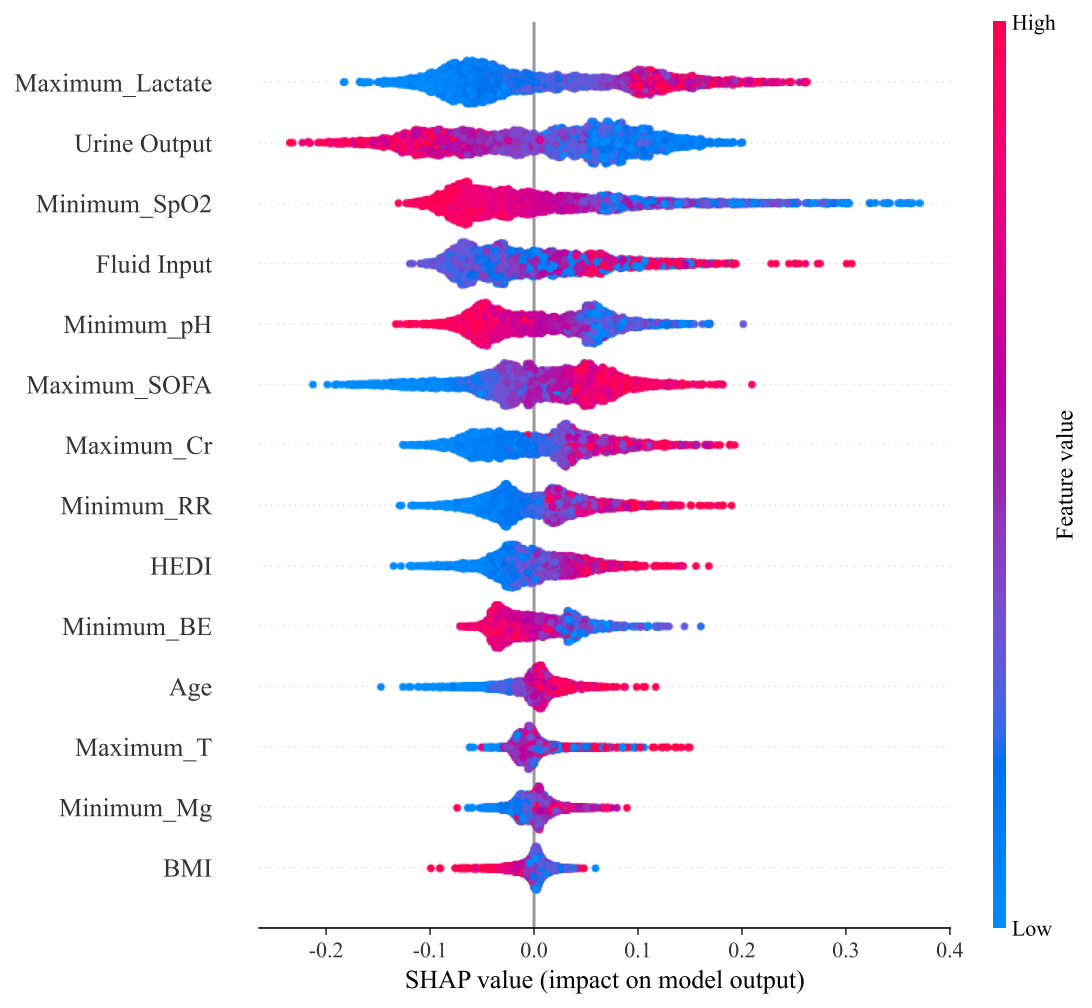


Maximum lactate level demonstrates the strongest positive impact on mortality prediction. 48-hour HEDI appears as an important contributor in Extra Trees, confirming its independent predictive value for ICU mortality.

**Figure S8. Extra Trees Model Performance in External Validation.**


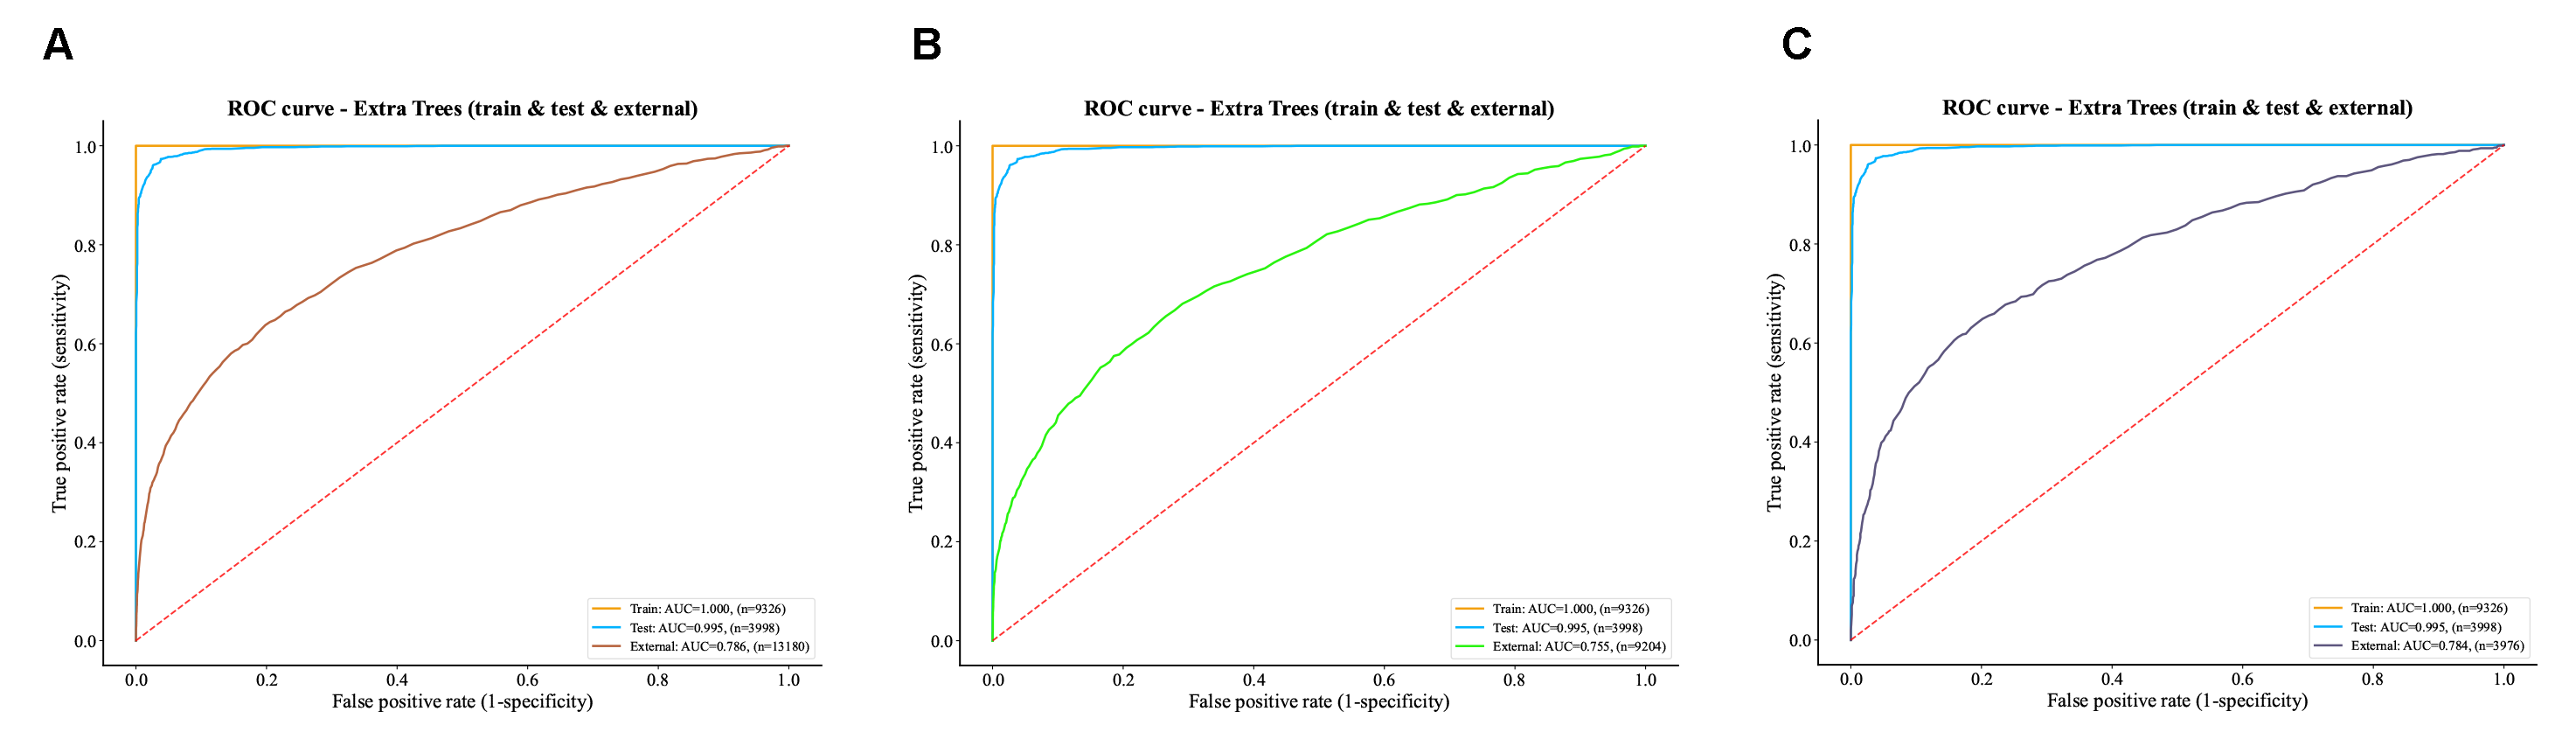


ROC curves demonstrating model performance in training (yellow), test (blue), and external validation cohorts (A: overall eICU population, n = 13,180; B: patients receiving vasopressors, n = 4,021; C: patients without vasopressors, n = 9,159).
